# Supplementary material for: Radical Scavenging-Linked Anti-Adipogenic Activity of Aster scaber Ethanolic Extract and Its Bioactive Compound
Source: PubMed Central journal article supplement (PMC7766398; doi:10.3390/antiox9121290), 2020-12-16
Supplement: antioxidants-09-01290-s001.pdf [file antioxidants-09-01290-s001.pdf]

**Table S1.** HPLC-Q-ToF conditions for ASE analysis

| Instrument                 |                                                                                | Conditions                          |                          |
|----------------------------|--------------------------------------------------------------------------------|-------------------------------------|--------------------------|
| Column                     | CAPCELL PAK C18 UG120 S5<br>(4.6 mm x 250 mm x 5.0 $\mu$ m, OSAKA SODA, Japan) |                                     |                          |
| Column temp.               | 28°C                                                                           |                                     |                          |
|                            | Time<br>(min)                                                                  | A<br>1% acetic acid in water<br>(%) | B<br>Acetonitrile<br>(%) |
| Mobile phase<br>(Gradient) | 0                                                                              | 90                                  | 10                       |
|                            | 28                                                                             | 60                                  | 40                       |
|                            | 39                                                                             | 40                                  | 60                       |
|                            | 40                                                                             | 90                                  | 10                       |
|                            | 45                                                                             | 90                                  | 10                       |
| Detector                   | Diode Array Detector (DAD 3000) (272 nm)                                       |                                     |                          |
| Flow rate                  | 0.7 mL/min                                                                     |                                     |                          |
| Run time                   | 55 min                                                                         |                                     |                          |
| Injection volume           | 20 $\mu$ L                                                                     |                                     |                          |

**Table S2.** Q-TOF condition (Agilent 6550 Q-TOF with agilent 1260 HPLC)

| Instrument                               | Conditions |
|------------------------------------------|------------|
| Drying gas (N <sub>2</sub> ) flow rate   | 17 L/min   |
| Drying gas (N <sub>2</sub> ) temperature | 225 °C     |
| Nebulizer pressure                       | 45 psi     |
| Sheath gas temperature                   | 350 °C     |
| Sheath gas flow                          | 11 L/min   |
| Capillary voltage                        | 3,500 V    |
| Nozzle voltage                           | 2,000 V    |
| Fragmentor                               | 150 V      |
| skimmer                                  | 65 V       |
| OCT 1 RF V <sub>pp</sub>                 | 750 V      |
| Collision Energy                         | 25 V       |
| Ion polarity                             | Negative   |

**Table S3.** LC-PDA conditions for ASE analysis

| Instrument                         |                                                      | Conditions                             |                      |
|------------------------------------|------------------------------------------------------|----------------------------------------|----------------------|
| <b>Column</b>                      | Capcell Pak C18 UG12, (4.6 mm x 250 mm, 5.0 $\mu$ m) |                                        |                      |
| <b>Column temp.</b>                | 25°C                                                 |                                        |                      |
| <b>Mobile phase<br/>(Gradient)</b> | Time<br>(min)                                        | A<br>0.05% formic acid in water<br>(%) | B<br>Methanol<br>(%) |

|    |    |    |
|----|----|----|
| 0  | 95 | 5  |
| 10 | 95 | 5  |
| 15 | 85 | 15 |
| 20 | 70 | 30 |
| 30 | 60 | 40 |
| 50 | 55 | 45 |
| 52 | 40 | 60 |
| 60 | 20 | 80 |
| 65 | 95 | 5  |

**Detector** Waters 996 Photodiode Array Detector (280 nm)

**Flow rate** 0.8 mL/min

**Run time** 65 min

**Injection volume** 50  $\mu$ L

---
